# Supplementary material for: Constructing a Flood-Adaptive Ecological Security Pattern from the Perspective of Ecological Resilience: A Case Study of the Main Urban Area in Wuhan
Source: MDPI journal article supplement (doi:10.3390/ijerph20010385), 2022-12-26
Supplement: s1 [file s1]

There are 9 ecological corridors found in the Hankou Ecological Zone:

| corridor | Location                                                                                                                                                                                                                                             |
|----------|------------------------------------------------------------------------------------------------------------------------------------------------------------------------------------------------------------------------------------------------------|
| ①        | Tazi Lake–Tazihu East Road–Harmony Avenue–Changgang Road–Jiangfa Road–Garden Expo Park–Fengmei Road–Chang'an Road–Hubei University of Police–Gutian 3rd Road–Hanjiang River–Yangcheng–Hanjiangyuan–Huayuanwan Road–Fairy Mountain Road–Longyang Lake |
| ②        | Tazi Lake–Tazihu East Road–Zhongyi Road–Huangxiaohe Road–Jianshe Avenue–Chestnut Lake–Huanzi Lake Group                                                                                                                                              |
| ③        | Tazihu–Tazihu East Road–Zhongyi Road–Huangpu Street–Yangtze River                                                                                                                                                                                    |
| ④        | Chestnut lake–Huanzi Lake Group–Jianshe Avenue–Mengze Lake Park                                                                                                                                                                                      |
| ⑤        | Small South Lake Park–Xinhua Road–Changjiang Daily Road–Jiefang Avenue–Macau Road–Sanyang Road–Yangtze River                                                                                                                                         |
| ⑥        | Mengze Lake Park–The above-ground part of Metro Line 3–Jiefang Avenue–Second Ring Line                                                                                                                                                               |
| ⑦        | Small South Lake Park–Xinhua Road–Shuangdong Main Street–Jingnan Avenue–Wusheng Road Overpass–Parrot Avenue–Moon Lake                                                                                                                                |
| ⑧        | Small South Lake Park–Xinhua Road–Shuangdong Main Street–Friendship Road–Friendship South Road–Hanjiang River                                                                                                                                        |
| ⑨        | Jiefang Avenue–Hanxi Road–Hanjiang River–Qintai Avenue–Moon Lake Bridge–Moon Lake                                                                                                                                                                    |

16 ecological corridors were found in the Hanyang Ecological Zone:

| corridor | Location                                                                                                             |
|----------|----------------------------------------------------------------------------------------------------------------------|
| ⑩        | Longyang Lake–Moshui Lake North Road–Yulong Road–Hanyang Avenue–Jinlong Road–Rose Street–Longyang Avenue             |
| ⑪        | Wuqin Road–Hanyang Avenue–Ma Canghu Road–Moshui Lake                                                                 |
| ⑫        | Longyang Lake–Majialing Road–Moshui Lake                                                                             |
| ⑬        | Moshui Lake–Sixin Middle Road–Yangsigang Expressway–Sixin North Road–Yangtze River                                   |
| ⑭        | Longyang Lake–Triangle Lake                                                                                          |
| ⑮        | Moshui Lake–Sixin Middle Road–Wandao Wetland Park–Sixin Avenue–Fangcao Road–North Taizi Lake                         |
| ⑯        | Triangle Lake–North Taizi Lake                                                                                       |
| ⑰        | Triangle Lake–Boxue Road–Bihu Road–Houguan Lake                                                                      |
| ⑱        | Triangle Lake–Xinmin River–South Taizi Lake                                                                          |
| ⑲        | North Taizi Lake–South Third Ring Wetland Park–Haitang Road–Taizi Lake North Road–Jiangcheng Avenue–South Taizi Lake |
| ⑳        | Moshui Lake–Jiangxinyuan Road–Guobo Avenue–Second Ring Road–Yangtze River                                            |
| ㉑        | South Taizi Lake–Dunkou Road–Guobo Avenue–Sixin North Road–Yangtze River                                             |
| ㉒        | The north part of Houguan Lake–Guanhu Road–The south part of Houguan Lake                                            |
| ㉓        | The south part of Houguan Lake–Lianhu Road–Dongfeng Avenue–South                                                     |

|    |                                                                   |
|----|-------------------------------------------------------------------|
|    | Checheng Road–Tanghu                                              |
| ②④ | Tanghu–Checheng Avenue–Wanjia Lake                                |
| ②⑤ | Wanjia Lake–Wanjiahu Middle Road–Binhu West Road–South Taizi Lake |

7 ecological corridors were found in the Wuchang Ecological Zone:

| corridor | Location                                                                                                                                                               |
|----------|------------------------------------------------------------------------------------------------------------------------------------------------------------------------|
| ②⑥       | East Lake–Chu River–Shahu–Chuhan Road–Yangtze River                                                                                                                    |
| ②⑦       | South Lake–Wuhan Institute of Technology (Yongjun Road)–East Lake–Yangchun Lake Road–Yangchun Lake–East Lake Port–Qingshan Park–Liulin Park                            |
| ②⑧       | Yangtze River–Zhonghua Road–Shouyi Park–Wuluo Road–Jiedaokou                                                                                                           |
| ②⑨       | 3rd Ring Road–Guangxia West Road–Guangxia Road–Fengsheng Road–Fengsheng East Road–Maotan Park–Living Water Park–River Tour Company–Zhongshan Road–Gongzheng Road–Shahu |
| ③⑩       | East Lake–Central China Normal University–Guiyuan Road–Wuhan University of Technology–Jiedaokou–Luoshi Road–East Lake; ③⑪ Yanxi Lake–Yanxi Lake Tunnel–East Lake       |
| ③⑪       | Yanxi Lake–Yanxi Lake Tunnel–East Lake                                                                                                                                 |
| ③⑫       | Yezhi Lake–Nanhu Avenue–Hubei University of Technology–Wuchang Institute of Technology–Metro Line 2 (under construction)–Yangtze River                                 |
