# Supplementary material for: Constructing a Flood-Adaptive Ecological Security Pattern from the Perspective of Ecological Resilience: A Case Study of the Main Urban Area in Wuhan
Source: Int J Environ Res Public Health. 2022 Dec 26;20(1):385. doi: 10.3390/ijerph20010385 (PMC9820015; doi:10.3390/ijerph20010385)
Supplement: Supplementary file 1 [file ijerph-20-00385-s001.zip]

Archive with 4 entries (4 files):
- Figure S1 runoff path distribution.png
- Figure S2 Waterlogging risk points distribution.png
- Table S1 Specific location of the corridor.pdf
- Table S2 Interaction matrix..xlsx
