# Supplementary material for: Constructing a Flood-Adaptive Ecological Security Pattern from the Perspective of Ecological Resilience: A Case Study of the Main Urban Area in Wuhan
Source: Int J Environ Res Public Health. 2022 Dec 26;20(1):385. doi: 10.3390/ijerph20010385 (PMC9820015; doi:10.3390/ijerph20010385)
Supplement: Supplementary file 1 [file ijerph-20-00385-s001.zip › Table S2 Interaction matrix..xlsx]

## Sheet: Sheet1
source	1	2	3	4	5	6	7	8	9	10	11	12	13	14	15	16	17	18	19
1	0
2	160.758	0
3	7.7389	21.9847	0
4	73.1242	127.483	9.00744	0
5	28.1136	43.9347	6.23475	151.066	0
6	6.71103	8.27495	2.24146	14.9105	49.4467	0
7	5.41128	9.10906	2.02713	17.0131	45.4481	16.8606	0
8	3.88998	6.44764	1.64399	10.5466	24.1876	24.7413	96.5677	0
9	2.02724	3.29805	1.00253	4.65363	8.06533	6.7472	14.4242	21.7436	0
10	1.38261	2.23234	0.731835	2.97633	4.67511	3.09337	6.22039	7.57936	32.3217	0
11	2.65827	4.35476	1.30498	6.21349	10.151	4.03988	11.9738	10.8251	15.8873	22.3164	0
12	2.88511	4.76999	1.31911	7.2659	11.5124	3.74356	10.8084	8.32457	6.37251	6.12437	46.721	0
13	6.10378	10.3131	2.38391	18.528	33.3932	7.99048	26.5911	17.4134	9.97805	6.09558	21.7706	66.2085	0
14	3.44868	6.63904	1.79759	8.73764	6.99412	2.17793	2.31158	1.8855	1.16692	0.887848	1.69196	2.09662	3.43687	0
15	4.33577	8.38922	2.23811	11.1299	8.82496	2.71416	2.88361	2.34267	1.43379	1.04657	1.86757	1.99883	3.43653	32.0432	0
16	14.5847	46.0214	7.06937	36.4539	21.1279	5.05318	5.47273	4.12298	2.28145	1.59214	2.9897	3.16238	6.30633	6.65058	12.9985	0
17	2.94048	6.06208	1.89501	6.45728	5.51455	1.90318	2.00274	1.69076	1.18095	0.818884	1.41452	1.39487	2.38094	3.21271	7.0166	13.606	0
18	4.4265	9.65168	3.18892	8.83652	7.3782	2.46897	2.60493	2.17607	1.38407	1.03032	1.79516	1.78317	3.08807	4.12259	7.62682	25.0864	22.3994	0
19	13.3934	32.7291	7.5623	36.9023	26.2226	7.19105	7.70932	6.04309	3.52211	2.51446	4.59652	4.7602	8.98205	14.38	39.7613	188.874	65.253	84.2102	0
